# Supplementary material for: The Role of the Extracellular Matrix Protein Mindin in Airway Response to Environmental Airways Injury
Source: PubMed Central journal article supplement (PMC3230443; doi:10.1289/ehp.1003339), 2011-06-17
Supplement: ehp.1003339.s001.pdf [file ehp.1003339.s001.pdf]

**Supplemental Material: The role of the extracellular matrix protein mindin in airway response to environmental airways injury**

Sarah Frush<sup>1\*</sup>, Zhuowei Li<sup>1\*</sup>, Erin N. Potts<sup>1</sup>, Wanglei Du<sup>1</sup>, Jerry P. Eu<sup>1</sup>, Stavros Garantziotis<sup>2</sup>, You-Wen He<sup>3</sup>, W. Michael Foster<sup>1</sup>, John W. Hollingsworth<sup>1,3</sup>

<sup>1</sup>Division of Pulmonary, Allergy, and Critical Care Medicine, Department of Medicine, Duke University, Durham, NC

<sup>2</sup>National Institute of Environmental Health Sciences, Research Triangle Park, NC

<sup>3</sup>Department of Immunology, Duke University, Durham, NC

\*Authors contributed equally to this work.

**Corresponding Author:** John W. Hollingsworth, MD, Division of Pulmonary, Allergy, and Critical Care Medicine, Duke University Medical Center, Box 103004, Durham, North Carolina 27710, Telephone: 919-684-4588, Fax: 919-684-3067, email: [holli017@mc.duke.edu](mailto:holli017@mc.duke.edu)

**Running Title:** Mindin regulates environmental airways disease

**Keywords:** ozone, lipopolysaccharide, LPS, endotoxin, TLR4, toll-like receptor, innate immunity, lung

**Acknowledgements:** This work was supported by the NIH (ES016126 to JWH and HL081825 to JPE).

## **SUPPLEMENT METHODS**

### **RT-PCR**

Total RNA was extracted from whole lung homogenates using Qiagen RNeasy Mini Kit (Qiagen Inc., Valencia, CA) according to the manufacturer's protocol. RNA samples were then treated with RNase-free DNase I (Ambion, Austin, TX) to clear DNA contamination. cDNA was synthesized using BIO-RAD iScript reverse transcriptase (IBio-Rad Laboratories, Hercules, CA) following the manufacturer's instruction. All real-time quantitative polymerase chain reactions (qPCRs) were performed using ABI SDS 7300 and SYBR advantage qPCR premix (Clontech, Mountain View, CA). Primers were produced by IDT, Inc. (Coralville, IA) and sequences are as follows:

TLR4 Forward, 5'-AGAAATTCCTGCAGTGGGTCA-3';

TLR4 Reverse, 5'-TCTCTACAGGTGTTGCACATGTCA-3';

Mindin Forward, 5'-CAGCCCTGACTGGTTTGTGGGC-3';

Mindin Reverse, 5'-CCCTGGGACTCTGCTGTAGCCGCACG-3';

18S Forward, 5'-GTAACCCGTTGAACCCATT-3';

18S Reverse, 5'-CCATCCAATCGGTAGTAGCG-3'.

### **HA Challenge**

As previously reported (Garantziotis, Li et al. 2009; Garantziotis, Li et al. 2010), sterile, endotoxin-free (0.00008 endotoxin units/mL) high molecular weight hyaluronan (HMW-HA) (Healon, AMO, Santa Ana, CA) was reconstituted at 0.5 mg/mL in 0.02 M acetate, 0.15 M sodium chloride, pH 6.0. For the production of low molecular weight hyaluronan

(sHA), hyaluronan was sonicated on ice. In some experiments, 50  $\mu$ L of either sHA or vehicle were instilled oropharyngeally into anesthetized mice and AHR was measured invasively 2-4 h later.

### **Statistics**

Data are expressed as mean  $\pm$  S.E. Significant differences between groups were identified by Student's *t* test. A two-tailed *p* value of  $< 0.05$  was considered statistically significant.

### **REFERENCES**

- Garantziotis, S., Z. Li, et al. (2009). "Hyaluronan mediates ozone-induced airway hyperresponsiveness in mice." J Biol Chem 284(17): 11309-11317.
- Garantziotis, S., Z. Li, et al. (2010). "TLR4 is Necessary for Hyaluronan-mediated Airway Hyperresponsiveness After Ozone Inhalation." Am J Respir Crit Care Med 181(7): 666-675.

## FIGURES

### Supplement Figure 1.

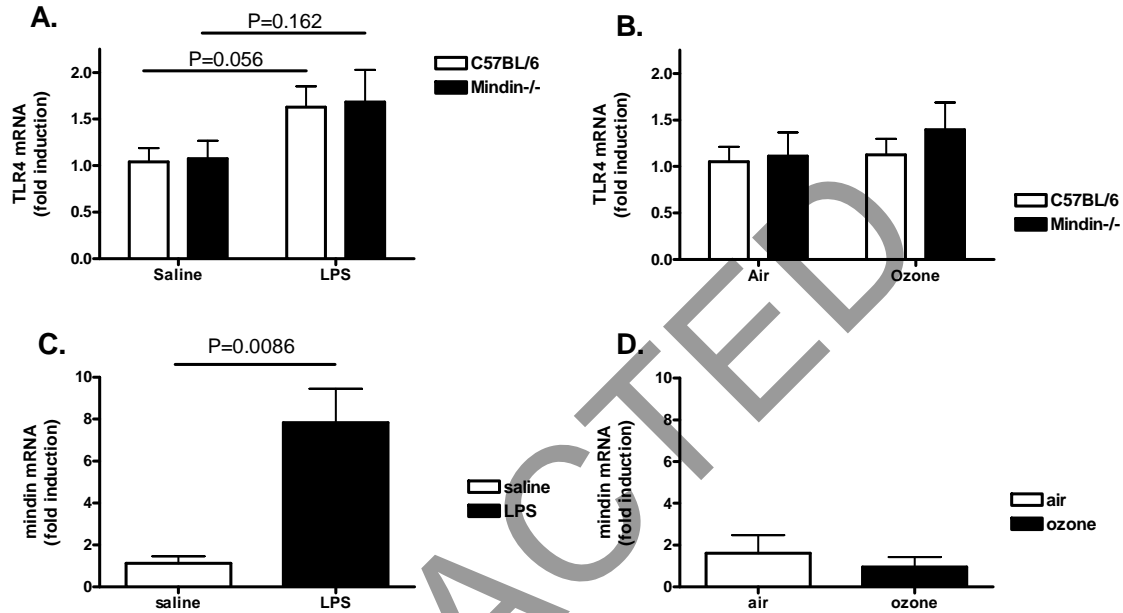

**Supplement Figure 1.** Whole lung TLR4 expression is independent of mindin and level of mindin expression after environmental challenge. (A) TLR4 expression after exposure to saline and LPS. No significant differences in fold induction were observed, although there was a trend toward increased fold induction after LPS exposure in both WT ( $p = 0.056$ ) and KO ( $p = 0.162$ ) mice as compared to their saline-exposed counterparts. (B) TLR4 expression after exposure to filtered air and ozone. No significant differences in fold induction were observed. (C) Mindin expression was significantly increased after exposure to inhaled LPS when compared to saline ( $p = 0.0086$ ). (D) Mindin expression was not affected by inhalation of ozone.

## Supplement Figure 2.

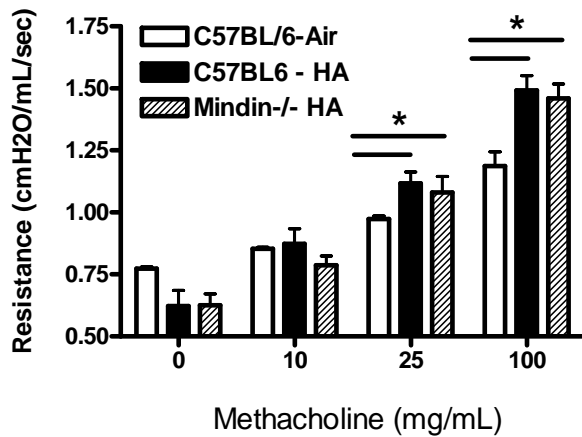

**Supplement Figure 2.** *Enhanced methacholine sensitivity after challenge to hyaluronan is independent of mindin.* At low levels of methacholine (0 and 10 mg/mL, respectively), no significant differences in AHR were detected. At 25 mg/mL, there was a significant increase in AHR (\* $p < 0.05$ ) between HA-exposed KO mice and air-exposed WT mice. There was also a significant increase (\* $p < 0.05$ ) between HA-exposed WT mice and their air-exposed counterparts. These same statistically significant increases were also true at a methacholine dose of 100 mg/mL.
